# Supplementary material for: Self-assembly of nitrogen-doped carbon nanoparticles: a new ratiometric UV-vis optical sensor for the highly sensitive and selective detection of Hg2+ in aqueous solution
Source: Royal Society of Chemistry journal article supplement (doi:10.1039/c6an00465b), 2016-01-01
Supplement: c6an00465b1.pdf [file c6an00465b1.pdf]

## Electronic Supporting Information (ESI)

### Self-assembly of Nitrogen-Doped Carbon Nanoparticle: A New Ratio UV-vis Optical Sensor for High Sensitive and Selective Detection of $\text{Hg}^{2+}$ in Aqueous Solution \*\*

Yudi Ruan<sup>ab</sup>, Lie Wu<sup>ab</sup>, Xiue Jiang<sup>a\*</sup>

<sup>a</sup>State Key Laboratory of Electroanalytical Chemistry, Changchun Institute of Applied Chemistry Changchun 130022, Jilin (China). E-mail: jiangxiue@ciac.ac.cn; Fax: (+86) 431-85262065

<sup>b</sup>University of the Chinese Academy of Sciences Beijing 100049 (China)

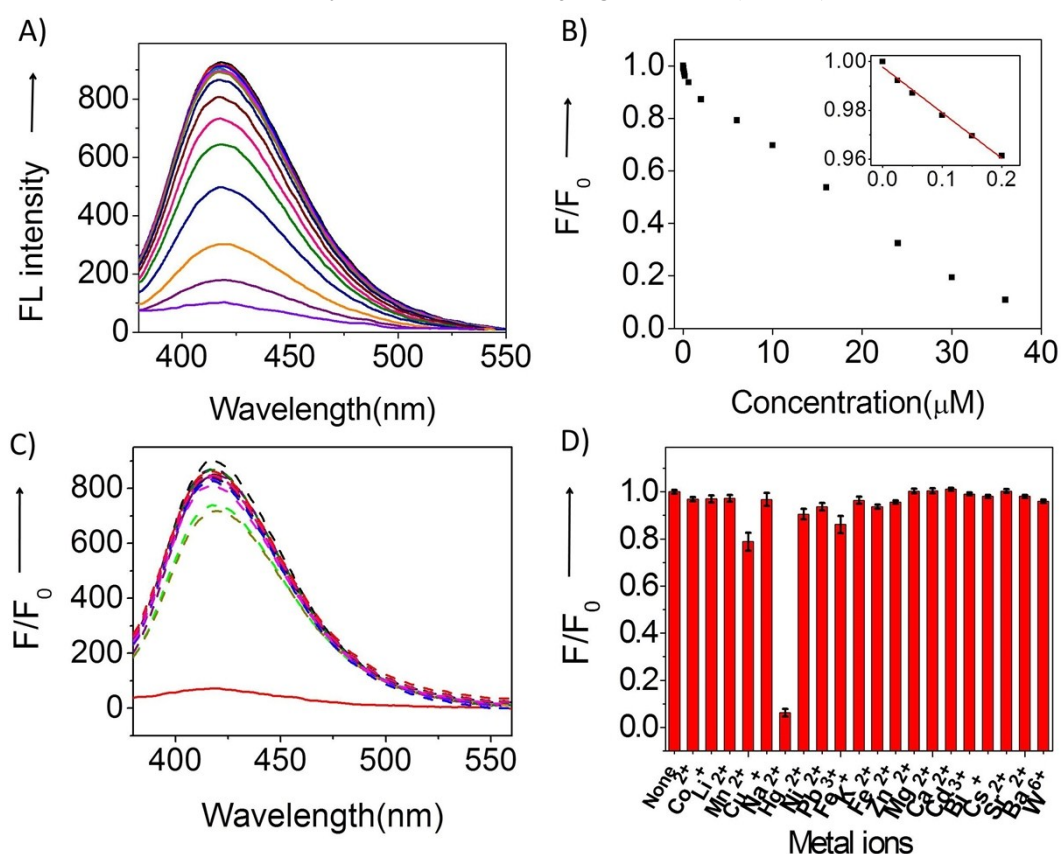

Fig. S1 The N-CNPs were used as a fluorescence sensor to detect  $\text{Hg}^{2+}$ . (A) Fluorescence emission spectra of N-CNPs dispersion in the presence of different  $\text{Hg}^{2+}$  concentrations (from top to bottom: 0, 0.025, 0.05, 0.10, 0.15, 0.20, 0.60, 2.0, 6.0, 10.0, 16.0, 24.0, 30.0, 36.0  $\mu\text{M}$ ). (B) Plots of the values of  $F/F_0$  versus the concentrations of  $\text{Hg}^{2+}$ , Where  $F$ ,  $F_0$  are the fluorescence intensities of N-CNPs at 420 nm in the absence and presence of  $\text{Hg}^{2+}$ . (C) Fluorescence emission spectra of N-CNPs dispersion in the presence of different metal ions. The concentrations of all the metal ions are 100  $\mu\text{M}$  and the final

concentration of the N-CNPs is 30  $\mu\text{g/mL}$ . (D) Selectivity of the N-CNPs-based fluorescent system: the value of  $F/F_0$  is derived from Figure C. The concentrations of all the metal ions are 100  $\mu\text{M}$  and the final concentration of the N-CNPs is 30  $\mu\text{g/mL}$ .

The N-CNPs dispersion exhibits a strong PL peak at 420 nm in the absence of  $\text{Hg}^{2+}$  when excited by 355 nm UV light. The presence of  $\text{Hg}^{2+}$ , however, results in an obvious decrease of fluorescence intensity, indicating that the  $\text{Hg}^{2+}$  can effectively quench the fluorescence of N-CNPs. Figure S1A shows the fluorescent spectra of N-CNPs dispersion after adding various concentrations of  $\text{Hg}^{2+}$ . With the addition of  $\text{Hg}^{2+}$ , the fluorescence intensity at 420 nm was gradually decreased, indicating that the fluorescence intensity of the mixture is sensitive to  $\text{Hg}^{2+}$  concentration. The fitting line of  $F_0/F$  ( $F$ ,  $F_0$  are the fluorescence intensities of N-CNPs at 420 nm in the absence and presence of  $\text{Hg}^{2+}$ , respectively) versus the concentrations of  $\text{Hg}^{2+}$  shows two linear regions at 0–0.2  $\mu\text{M}$  and 0.6–36  $\mu\text{M}$ , respectively. The detection limit is estimated to be 15.2 nM, which is 10 times higher than that of UV-vis sensor.

For the selectivity study, the same concentration (100  $\mu\text{M}$ ) of different metal ions, including  $\text{Li}^+$ ,  $\text{Na}^+$ ,  $\text{K}^+$ ,  $\text{Mg}^{2+}$ ,  $\text{Ca}^{2+}$ ,  $\text{Mn}^{2+}$ ,  $\text{Fe}^{2+}$ ,  $\text{Co}^{2+}$ ,  $\text{Ni}^{2+}$ ,  $\text{Cu}^{2+}$ ,  $\text{Zn}^{2+}$ ,  $\text{Pb}^{2+}$ ,  $\text{Hg}^{2+}$ ,  $\text{Fe}^{3+}$ ,  $\text{Cd}^{2+}$ ,  $\text{Bi}^{3+}$ ,  $\text{Cs}^+$ ,  $\text{Sr}^{2+}$ ,  $\text{Ba}^{2+}$ ,  $\text{W}^{6+}$ ,  $\text{Hg}^{2+}$  were added to the N-CNPs dispersion respectively. Figure 1D shows that although  $\text{Hg}^{2+}$  can decrease the fluorescent intensity greatest,  $\text{Cu}^{2+}$  and  $\text{Fe}^{3+}$  will also decrease the fluorescent intensity slightly.
